# Supplementary material for: Design, synthesis, crystal structure and luminescent properties of a new tantalum-phosphate K3BiTaP3O13 with negligible concentration quenching and good thermostability
Source: Royal Society of Chemistry journal article supplement (doi:10.1039/c9qi01279f), 2019-11-25
Supplement: c9qi01279f1.pdf [file c9qi01279f1.pdf]

**Table S1.** Fractional atomic coordinates and isotropic or equivalent isotropic displacement parameters ( $\text{\AA}^2$ ) of  $\text{K}_3\text{BiTaP}_3\text{O}_{13}$ .

|     | <i>x</i>     | <i>y</i>     | <i>z</i>    | $U_{\text{iso}}^*/U_{\text{eq}}$ |
|-----|--------------|--------------|-------------|----------------------------------|
| K1  | 0.40010 (11) | 0.28034 (10) | -0.250000   | 0.0253 (4)                       |
| K2  | 0.666667     | 0.333333     | 0.500000    | 0.0280 (6)                       |
| K3  | 0.000000     | 0.000000     | 0.000000    | 0.0297 (9)                       |
| Bi1 | 0.22163 (2)  | 0.22163 (2)  | 0.250000    | 0.01002 (9)                      |
| Ta1 | 0.500000     | 0.500000     | 0.000000    | 0.00884 (9)                      |
| P1  | 0.46274 (11) | 0.32463 (10) | 0.250000    | 0.0118 (3)                       |
| P2  | 0.18109 (13) | 0.18109 (13) | -0.250000   | 0.0119 (4)                       |
| O1  | 0.4739 (3)   | 0.3834 (2)   | 0.0776 (5)  | 0.0343 (10)                      |
| O2  | 0.5288 (3)   | 0.2972 (3)   | 0.250000    | 0.0300 (13)                      |
| O3  | 0.3712 (3)   | 0.2495 (3)   | 0.250000    | 0.0460 (19)                      |
| O4  | 0.2327 (3)   | 0.2327 (3)   | -0.0784 (7) | 0.0351 (13)                      |
| O5  | 0.1678 (4)   | 0.0894 (4)   | -0.250000   | 0.0410 (15)                      |
| O6  | 0.5432 (3)   | 0.5432 (3)   | 0.250000    | 0.0109 (12)                      |

**Table S2.** Atomic anisotropic displacement parameters ( $\text{\AA}^2$ ) of  $\text{K}_3\text{BiTaP}_3\text{O}_{13}$ .

|     | $U^{11}$     | $U^{22}$     | $U^{33}$     | $U^{12}$     | $U^{13}$     | $U^{23}$     |
|-----|--------------|--------------|--------------|--------------|--------------|--------------|
| K1  | 0.0251 (8)   | 0.0153 (7)   | 0.0385 (9)   | 0.0125 (7)   | 0.000        | 0.000        |
| K2  | 0.0243 (8)   | 0.0243 (8)   | 0.0354 (15)  | 0.0122 (4)   | 0.000        | 0.000        |
| K3  | 0.0330 (14)  | 0.0330 (14)  | 0.023 (2)    | 0.0165 (7)   | 0.000        | 0.000        |
| Bi1 | 0.01032 (13) | 0.01032 (13) | 0.00958 (15) | 0.00528 (13) | 0.000        | 0.000        |
| Ta1 | 0.01051 (13) | 0.01051 (13) | 0.00561 (14) | 0.00535 (14) | 0.00057 (11) | 0.00057 (11) |
| P1  | 0.0128 (8)   | 0.0087 (7)   | 0.0135 (7)   | 0.0050 (6)   | 0.000        | 0.000        |
| P2  | 0.0128 (8)   | 0.0128 (8)   | 0.0108 (10)  | 0.0069 (9)   | 0.000        | 0.000        |
| O1  | 0.073 (3)    | 0.0152 (17)  | 0.0127 (16)  | 0.020 (2)    | -0.0137 (18) | -0.0029 (14) |
| O2  | 0.016 (3)    | 0.022 (3)    | 0.055 (4)    | 0.011 (2)    | 0.000        | 0.000        |
| O3  | 0.012 (3)    | 0.010 (3)    | 0.113 (6)    | 0.003 (2)    | 0.000        | 0.000        |
| O4  | 0.034 (2)    | 0.034 (2)    | 0.015 (2)    | 0.000 (3)    | -0.0016 (18) | -0.0016 (18) |
| O5  | 0.058 (4)    | 0.029 (3)    | 0.054 (4)    | 0.035 (3)    | 0.000        | 0.000        |
| O6  | 0.011 (2)    | 0.011 (2)    | 0.009 (3)    | 0.005 (3)    | 0.000        | 0.000        |

**Table S3.** Select bond distances of  $\text{K}_3\text{BiTaP}_3\text{O}_{13}$ .

|                      |           |                        |           |
|----------------------|-----------|------------------------|-----------|
| K1—O3 <sup>i</sup>   | 2.597 (5) | K3—O5 <sup>xvii</sup>  | 3.134 (5) |
| K1—O6 <sup>ii</sup>  | 2.769 (5) | K3—O5 <sup>xviii</sup> | 3.134 (5) |
| K1—O2 <sup>i</sup>   | 2.818 (5) | Bi1—O5 <sup>vi</sup>   | 2.225 (5) |
| K1—O1                | 2.846 (4) | Bi1—O5 <sup>xi</sup>   | 2.225 (5) |
| K1—O1 <sup>iii</sup> | 2.846 (4) | Bi1—O4 <sup>xix</sup>  | 2.345 (5) |
| K1—O4                | 2.919 (4) | Bi1—O4                 | 2.345 (5) |
| K1—O4 <sup>iii</sup> | 2.919 (4) | Bi1—O3 <sup>xx</sup>   | 2.445 (5) |
| K2—O2 <sup>iv</sup>  | 2.827 (4) | Bi1—O3                 | 2.445 (5) |
| K2—O2 <sup>v</sup>   | 2.827 (4) | Ta1—O6 <sup>ii</sup>   | 1.937 (2) |

|                                                                                                                                                                                                                                                                                                                                                                                                                                                                                                                                                                |            |                                          |             |
|----------------------------------------------------------------------------------------------------------------------------------------------------------------------------------------------------------------------------------------------------------------------------------------------------------------------------------------------------------------------------------------------------------------------------------------------------------------------------------------------------------------------------------------------------------------|------------|------------------------------------------|-------------|
| K2—O2 <sup>vi</sup>                                                                                                                                                                                                                                                                                                                                                                                                                                                                                                                                            | 2.827 (4)  | Ta1—O6                                   | 1.937 (2)   |
| K2—O2 <sup>vii</sup>                                                                                                                                                                                                                                                                                                                                                                                                                                                                                                                                           | 2.827 (4)  | Ta1—O1 <sup>ii</sup>                     | 1.961 (3)   |
| K2—O2                                                                                                                                                                                                                                                                                                                                                                                                                                                                                                                                                          | 2.827 (4)  | Ta1—O1 <sup>xxi</sup>                    | 1.961 (3)   |
| K2—O2 <sup>viii</sup>                                                                                                                                                                                                                                                                                                                                                                                                                                                                                                                                          | 2.827 (4)  | Ta1—O1 <sup>xxii</sup>                   | 1.961 (3)   |
| K3—O5                                                                                                                                                                                                                                                                                                                                                                                                                                                                                                                                                          | 3.134 (5)  | Ta1—O1                                   | 1.961 (3)   |
| K3—O5 <sup>vi</sup>                                                                                                                                                                                                                                                                                                                                                                                                                                                                                                                                            | 3.134 (5)  | P1—O2                                    | 1.477 (5)   |
| K3—O5 <sup>ix</sup>                                                                                                                                                                                                                                                                                                                                                                                                                                                                                                                                            | 3.134 (5)  | P1—O3                                    | 1.501 (5)   |
| K3—O5 <sup>x</sup>                                                                                                                                                                                                                                                                                                                                                                                                                                                                                                                                             | 3.134 (5)  | P1—O1                                    | 1.557 (3)   |
| K3—O5 <sup>xi</sup>                                                                                                                                                                                                                                                                                                                                                                                                                                                                                                                                            | 3.134 (5)  | P1—O1 <sup>xix</sup>                     | 1.557 (3)   |
| K3—O5 <sup>xii</sup>                                                                                                                                                                                                                                                                                                                                                                                                                                                                                                                                           | 3.134 (5)  | P2—O5                                    | 1.523 (6)   |
| K3—O5 <sup>xiii</sup>                                                                                                                                                                                                                                                                                                                                                                                                                                                                                                                                          | 3.134 (5)  | P2—O5 <sup>xvii</sup>                    | 1.523 (6)   |
| K3—O5 <sup>xiv</sup>                                                                                                                                                                                                                                                                                                                                                                                                                                                                                                                                           | 3.134 (5)  | P2—O4 <sup>iii</sup>                     | 1.526 (5)   |
| K3—O5 <sup>xv</sup>                                                                                                                                                                                                                                                                                                                                                                                                                                                                                                                                            | 3.134 (5)  | P2—O4                                    | 1.526 (5)   |
| K3—O5 <sup>xvi</sup>                                                                                                                                                                                                                                                                                                                                                                                                                                                                                                                                           | 3.134 (5)  |                                          |             |
|                                                                                                                                                                                                                                                                                                                                                                                                                                                                                                                                                                |            |                                          |             |
| O6 <sup>ii</sup> —Ta1—O6                                                                                                                                                                                                                                                                                                                                                                                                                                                                                                                                       | 180.0      | O1 <sup>xxii</sup> —Ta1—O1               | 89.6 (3)    |
| O6 <sup>ii</sup> —Ta1—O1 <sup>ii</sup>                                                                                                                                                                                                                                                                                                                                                                                                                                                                                                                         | 89.85 (15) | O2—P1—O3                                 | 113.1 (3)   |
| O6—Ta1—O1 <sup>ii</sup>                                                                                                                                                                                                                                                                                                                                                                                                                                                                                                                                        | 90.15 (15) | O2—P1—O1                                 | 111.4 (2)   |
| O6 <sup>ii</sup> —Ta1—O1 <sup>xxi</sup>                                                                                                                                                                                                                                                                                                                                                                                                                                                                                                                        | 90.15 (15) | O3—P1—O1                                 | 108.3 (2)   |
| O6—Ta1—O1 <sup>xxi</sup>                                                                                                                                                                                                                                                                                                                                                                                                                                                                                                                                       | 89.85 (15) | O2—P1—O1 <sup>xix</sup>                  | 111.4 (2)   |
| O1 <sup>ii</sup> —Ta1—O1 <sup>xxi</sup>                                                                                                                                                                                                                                                                                                                                                                                                                                                                                                                        | 89.6 (3)   | O3—P1—O1 <sup>xix</sup>                  | 108.3 (2)   |
| O6 <sup>ii</sup> —Ta1—O1 <sup>xxii</sup>                                                                                                                                                                                                                                                                                                                                                                                                                                                                                                                       | 89.85 (15) | O1—P1—O1 <sup>xix</sup>                  | 103.9 (3)   |
| O6—Ta1—O1 <sup>xxii</sup>                                                                                                                                                                                                                                                                                                                                                                                                                                                                                                                                      | 90.15 (15) | O5—P2—O5 <sup>xvii</sup>                 | 104.5 (5)   |
| O1 <sup>ii</sup> —Ta1—O1 <sup>xxii</sup>                                                                                                                                                                                                                                                                                                                                                                                                                                                                                                                       | 90.4 (3)   | O5—P2—O4 <sup>iii</sup>                  | 111.54 (16) |
| O1 <sup>xxi</sup> —Ta1—O1 <sup>xxii</sup>                                                                                                                                                                                                                                                                                                                                                                                                                                                                                                                      | 180.00 (8) | O5 <sup>xvii</sup> —P2—O4 <sup>iii</sup> | 111.54 (16) |
| O6 <sup>ii</sup> —Ta1—O1                                                                                                                                                                                                                                                                                                                                                                                                                                                                                                                                       | 90.15 (15) | O5—P2—O4                                 | 111.54 (16) |
| O6—Ta1—O1                                                                                                                                                                                                                                                                                                                                                                                                                                                                                                                                                      | 89.85 (15) | O5 <sup>xvii</sup> —P2—O4                | 111.54 (16) |
| O1 <sup>ii</sup> —Ta1—O1                                                                                                                                                                                                                                                                                                                                                                                                                                                                                                                                       | 180.0      | O4 <sup>iii</sup> —P2—O4                 | 106.3 (4)   |
| O1 <sup>xxi</sup> —Ta1—O1                                                                                                                                                                                                                                                                                                                                                                                                                                                                                                                                      | 90.4 (3)   |                                          |             |
| Symmetry codes: (i) $x, x-y, z-1/2$ ; (ii) $-x+1, -y+1, -z$ ; (iii) $x, y, -z-1/2$ ; (iv) $-x+y+1, y, z+1/2$ ; (v) $-y+1, x-y, z$ ; (vi) $x, x-y, z+1/2$ ; (vii) $-x+y+1, -x+1, -z+1/2$ ; (viii) $-y+1, -x+1, z+1/2$ ; (ix) $-x, -x+y, -z-1/2$ ; (x) $-x+y, -x, -z-1/2$ ; (xi) $x-y, x, z+1/2$ ; (xii) $y, -x+y, -z$ ; (xiii) $-y, x-y, z$ ; (xiv) $-x+y, y, z+1/2$ ; (xv) $x-y, -y, -z-1/2$ ; (xvi) $-y, -x, z+1/2$ ; (xvii) $y, x, -z-1/2$ ; (xviii) $-x, -y, -z$ ; (xix) $x, y, -z+1/2$ ; (xx) $y, x, -z+1/2$ ; (xxi) $y, x, z$ ; (xxii) $-y+1, -x+1, -z$ . |            |                                          |             |

**Table S4.** The state energies (eV) of the lowest conduction band (L-CB) and the highest valence band (H-VB) at some k-points of  $K_3BiTaP_3O_{13}$ .

| k-point | G(0,0,0) | A(0,0,1/2) | H(-1/3,2/3,1/2) | K(-1/3,2/3,0) | G(0,0,0) | M(0,1/2,0) | L(0,1/2,1/2) | H(-1/3,2/3,1/2) |
|---------|----------|------------|-----------------|---------------|----------|------------|--------------|-----------------|
| L-CB    | 4.164    | 4.908      | 4.853           | 4.164         | 4.164    | 4.164      | 4.853        | 4.853           |
| H-VB    | -0.372   | 0.000      | -0.005          | -0.332        | -0.372   | -0.321     | -0.002       | -0.005          |

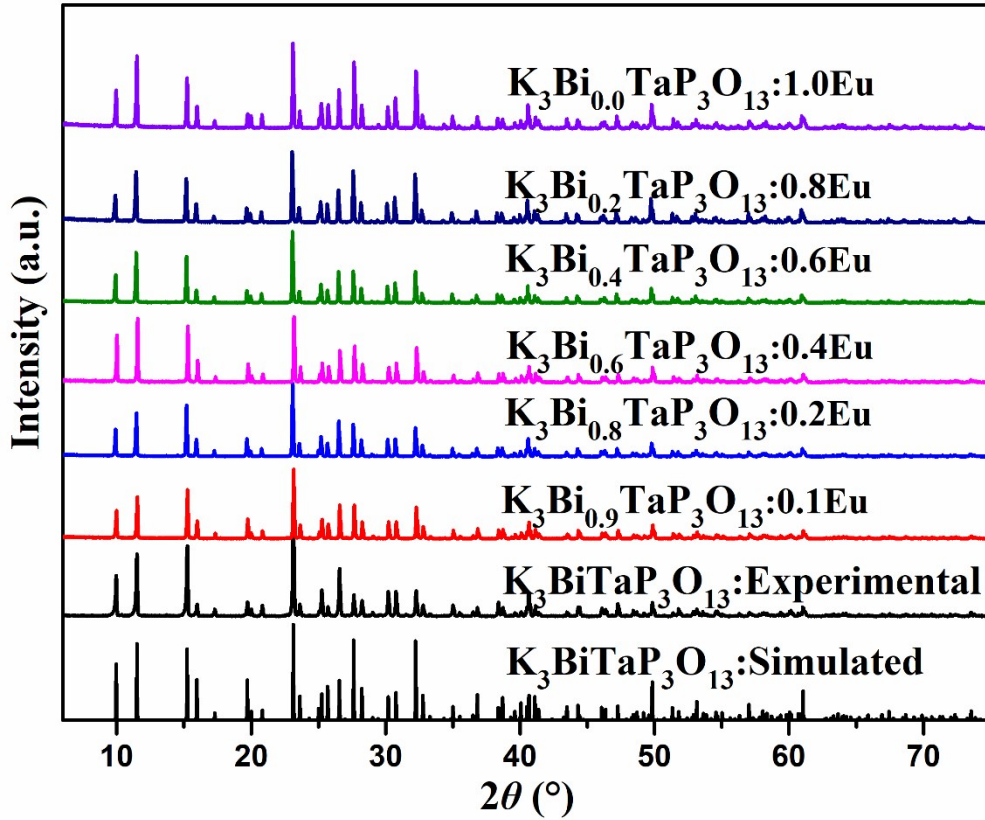

**Figure S1.** Simulated X-ray powder diffraction pattern of  $\text{K}_3\text{BiTaP}_3\text{O}_{13}$  and experimental X-ray powder diffraction patterns of  $\text{K}_3\text{Bi}_{1-x}\text{TaP}_3\text{O}_{13}:\text{xEu}$  ( $x=0-1$ ) in the  $2\theta$  range of  $6-75^\circ$ .

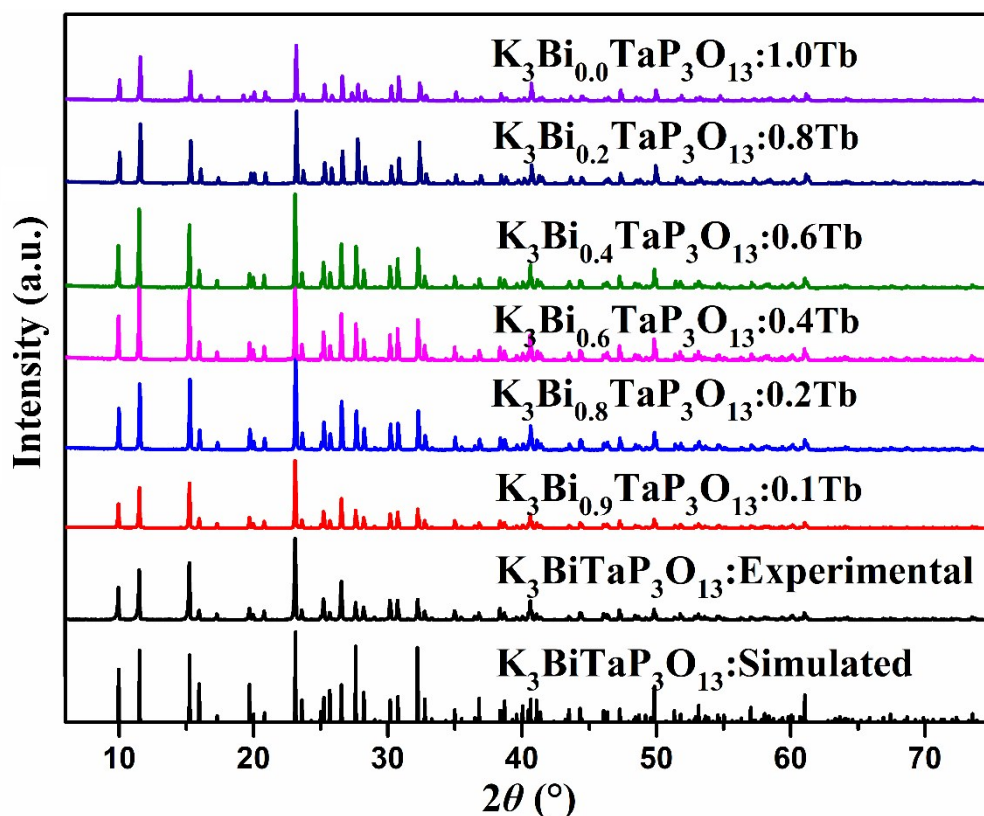

**Figure S2.** Simulated X-ray powder diffraction pattern of  $\text{K}_3\text{BiTaP}_3\text{O}_{13}$  and experimental X-ray powder diffraction patterns of  $\text{K}_3\text{Bi}_{1-x}\text{TaP}_3\text{O}_{13}:x\text{Tb}$  ( $x=0-1$ ) in the  $2\theta$  range of  $6-75^\circ$ .

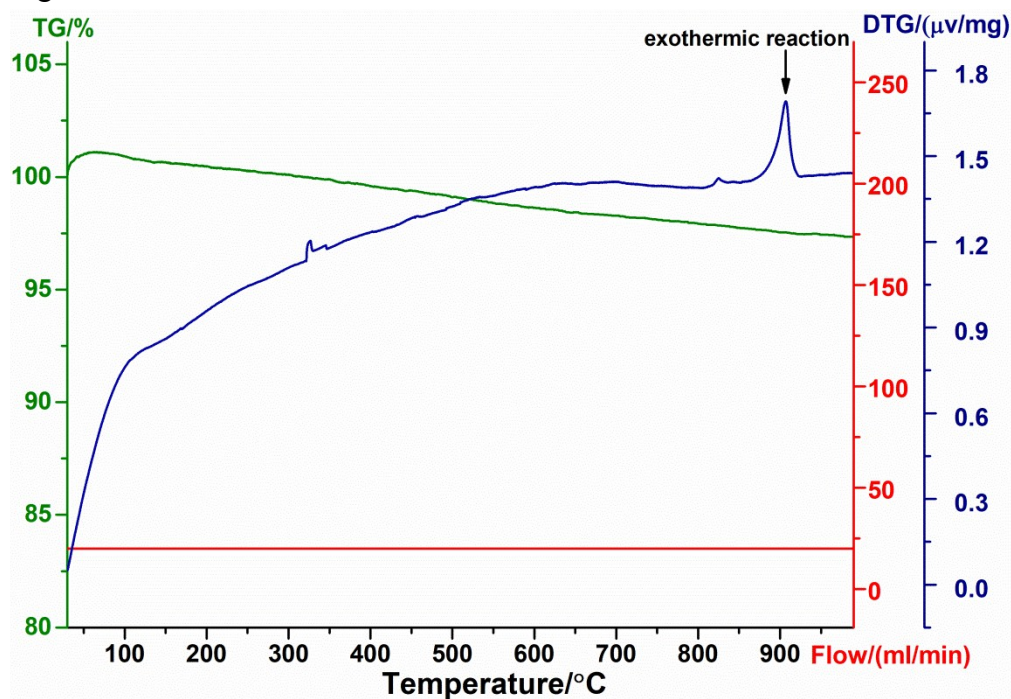

**Figure S3.** TG and DTA curves for  $\text{K}_3\text{BiTaP}_3\text{O}_{13}$ .

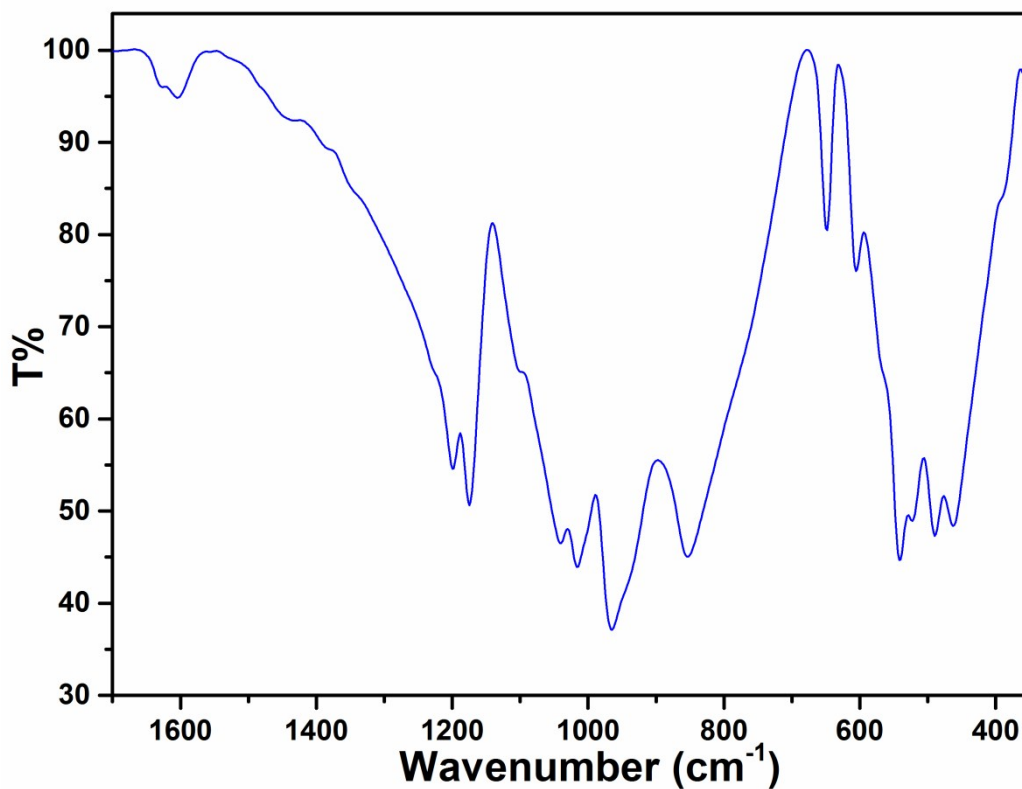

Figure S4. The IR spectra of orthophosphate  $K_3BiTaP_3O_{13}$  in the range of 350–1700  $cm^{-1}$ .

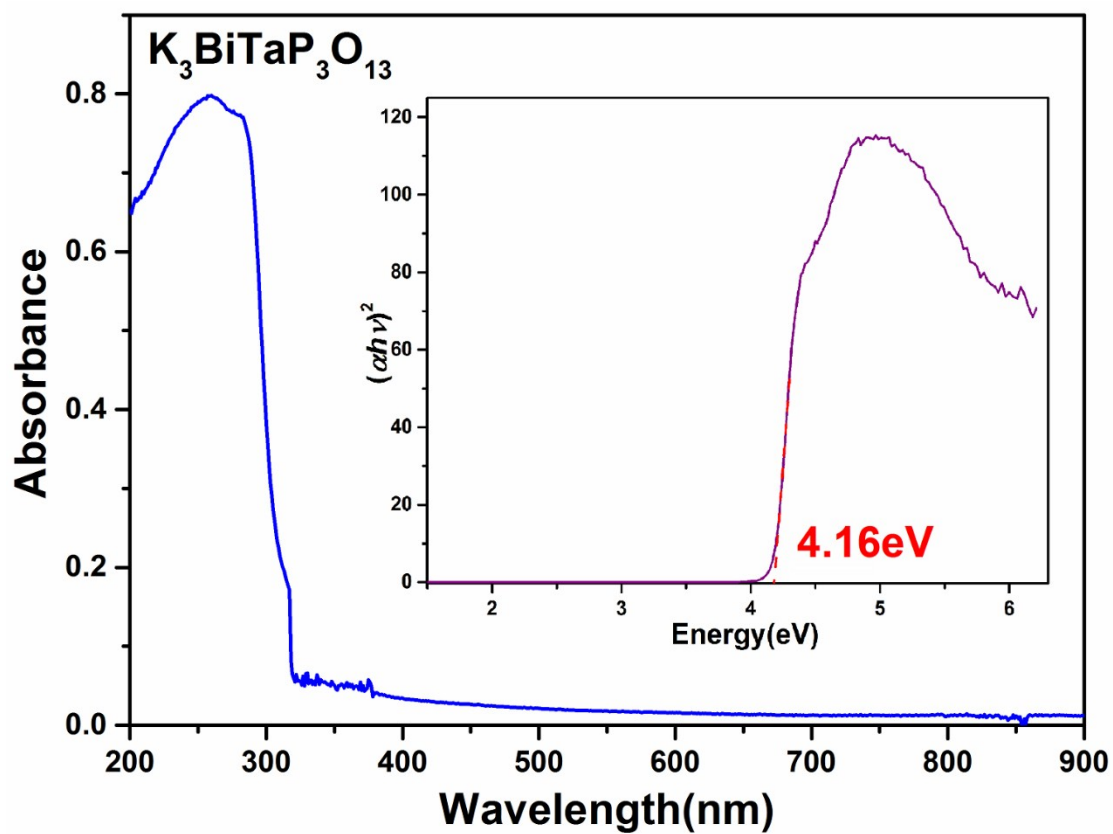

**Figure S5.** Experimental UV-vis absorption spectrum of  $\text{K}_3\text{BiTaP}_3\text{O}_{13}$  ranging from 200 to 900 nm.

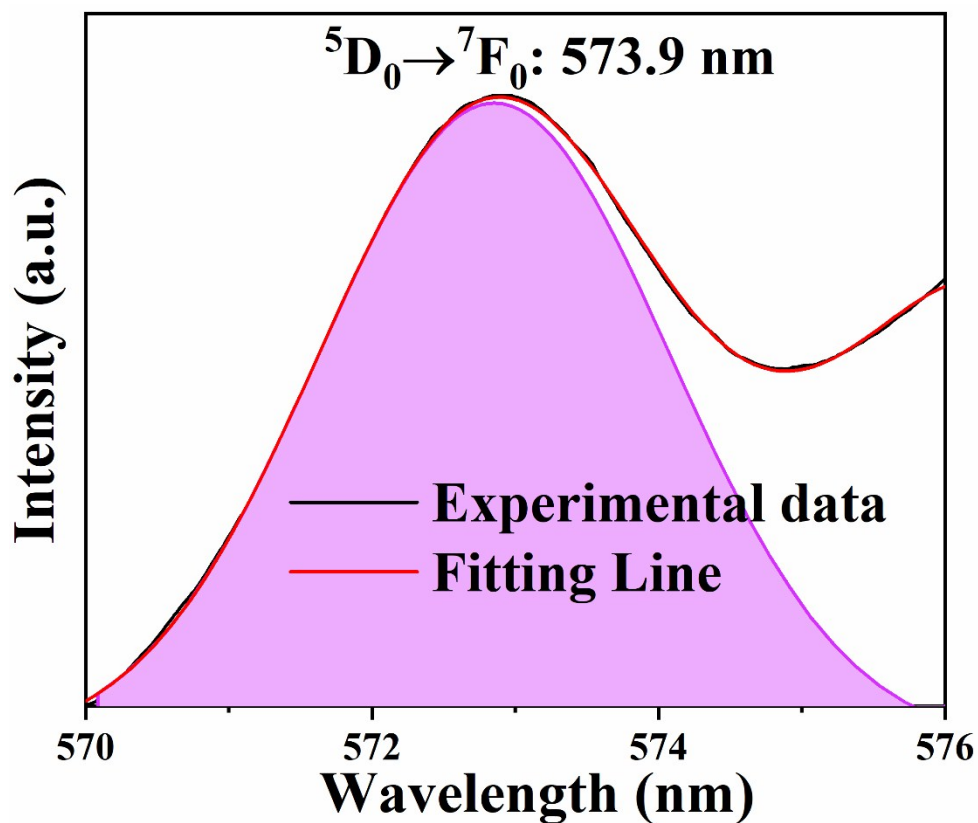

**Figure S6.** The emission spectrum of  $\text{K}_3\text{Bi}_{0.6}\text{Eu}_{0.4}\text{TaP}_3\text{O}_{13}$  at 570–576 nm to present the  $^5\text{D}_0 \rightarrow ^7\text{F}_0$  band in high definition.

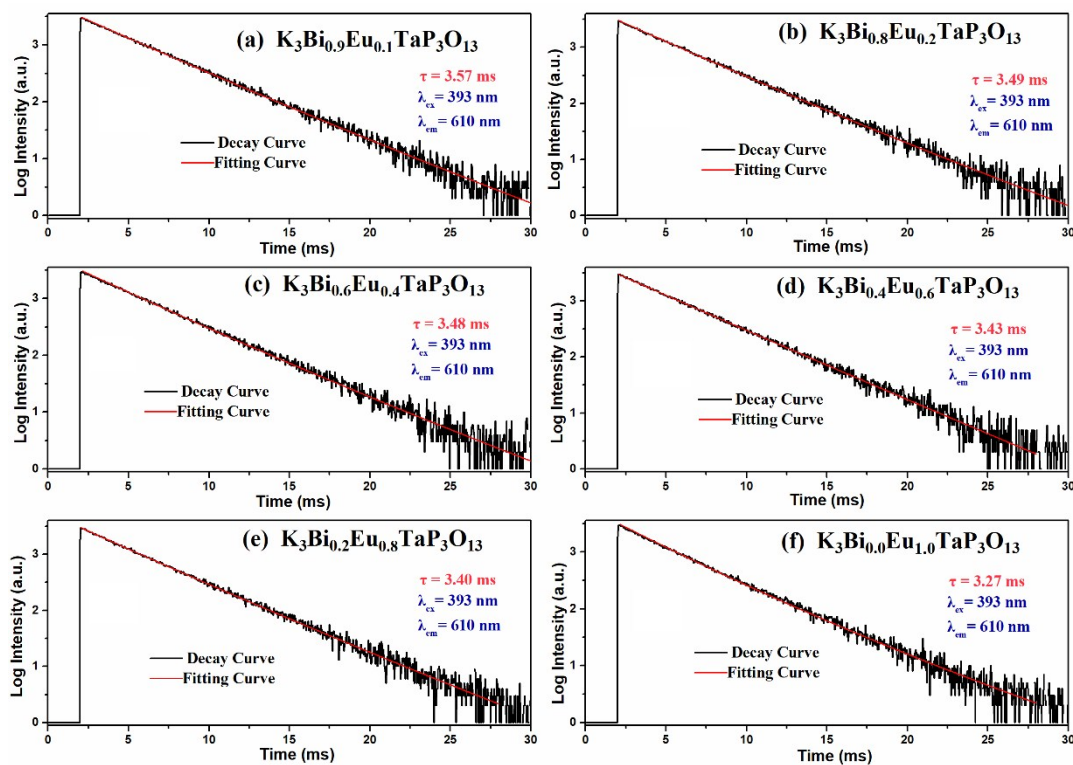

**Figure S7.** PL decay curves of the  $\text{Eu}^{3+}$  emission at 610 nm under 393 nm excitation for the phosphors  $\text{K}_3\text{Bi}_{1-x}\text{TaP}_3\text{O}_{13}:x\text{Eu}^{3+}$   $x = 0.1$  (a), 0.2 (b), 0.4 (c), 0.6 (d), 0.8 (e) and 1.0 (f).

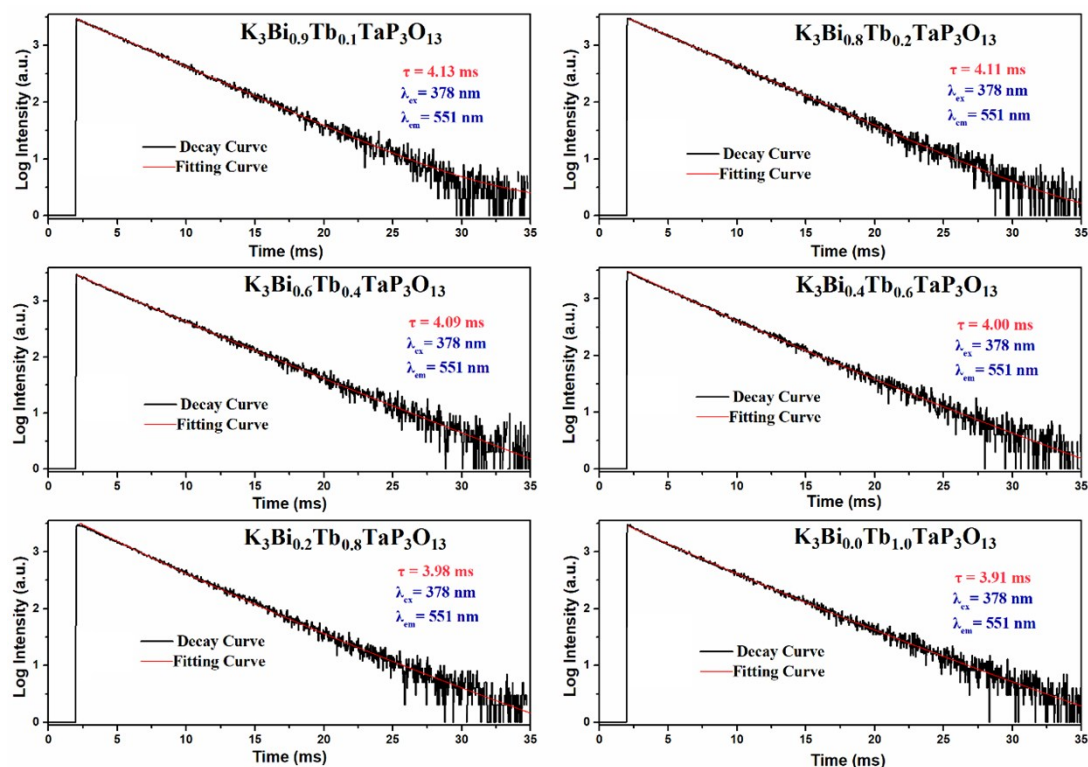

**Figure S8.** PL decay curves of the  $\text{Tb}^{3+}$  emission at 551 nm under 378 nm excitation for the phosphors  $\text{K}_3\text{Bi}_{1-x}\text{TaP}_3\text{O}_{13}:x\text{Tb}^{3+}$   $x = 0.1$  (a), 0.2 (b), 0.4 (c), 0.6 (d), 0.8 (e) and 1.0 (f).

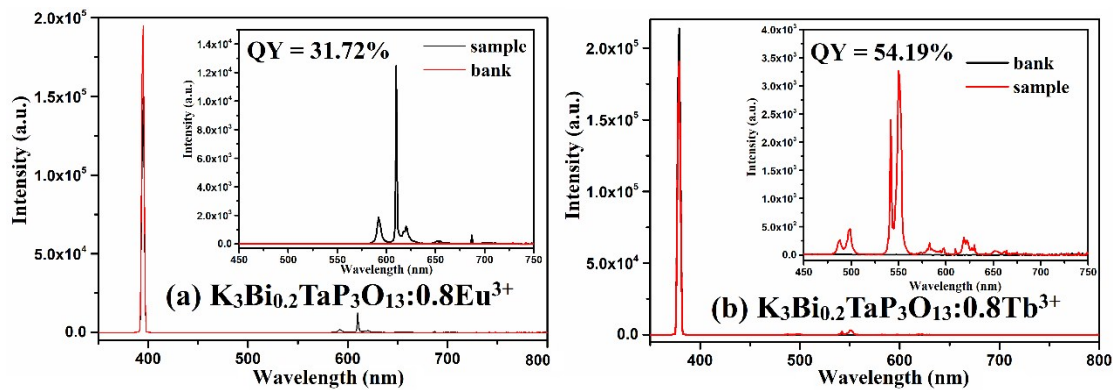

**Figure S9.** The fluorescence quantum yield of  $\text{K}_3\text{Bi}_{0.2}\text{TaP}_3\text{O}_{13}:0.8\text{Eu}^{3+}$  (a) excited by 393 nm and  $\text{K}_3\text{Bi}_{0.2}\text{TaP}_3\text{O}_{13}:0.8\text{Tb}^{3+}$  (b) excited by 378 nm.
